# Supplementary material for: RING finger E3 ligase PPP1R11 regulates TLR2 signaling and innate immunity
Source: eLife. 2016 Nov 2;5:e18496. doi: 10.7554/eLife.18496 (PMC5092053; doi:10.7554/eLife.18496)
Supplement: Figure 1—source data 1. — DOI: http://dx.doi.org/10.7554/eLife.18496.003 [file elife-18496-fig1-data1.xlsx]

## Sheet: Fig 1
Fig. 1C	HA-Ubiquitin OE CHX						Fig. 1E	PPP1R11 OE CHX
		Empty Vector		HA-Ubiquitin OE					Empty Vector		PPP1R11 OE
Experiment	Time (hr)	TLR2 band intensity	Normalized	TLR2 band intensity	Normalized		Experiment	Time (hr)	TLR2 band intensity	Normalized	TLR2 band intensity	Normalized
1	0	267206	1	89774.6	1		1	0	676422	1	171842	1
	4	178600	0.668397	54700.8	0.609317			4	492564	0.728191	77299.2	0.44983
	8	134065	0.501728	26989	0.300633			8	288490	0.426495	30020.6	0.1747
2	0	401703	1	165818	1		2	0	317334	1	126136	1
	4	298338	0.742682	32837.6	0.198034			4	257143	0.810325	99275.5	0.787051
	8	168012	0.41825	15848.8	0.0955794			8	169742	0.534903	11399.7	0.0903761
3	0	113208	1	65343.4	1		3	0	2.37894e+06	1	982336	1
	4	96922.1	0.856142	33677.8	0.5154			4	1.89343e+06	0.795914	380206	0.387043
	8	69418.6	0.613195	14978.9	0.229235			8	1.28919e+06	0.541917	82306.8	0.0837868
Fig. 1F	PPP1R11 siRNA (1) CHX
		Scramble siRNA		PPP1R11 siRNA
Experiment	Time (hr)	TLR2 band intensity	Normalized	TLR2 band intensity	Normalized
1	0	235765	1	231822	1
	4	177398	0.752437	249274	1.07528
	8	123036	0.521861	232005	1.00079
2	0	529263	1	666384	1
	4	445841	0.842382	700242	1.05084
	8	268521	0.507349	659717	0.990026
3	0	121700	1	93911.3	1
	4	103899	0.853733	112242	1.1952
	8	64294.8	0.528305	100102	1.06592
