# Supplementary material for: RING finger E3 ligase PPP1R11 regulates TLR2 signaling and innate immunity
Source: eLife. 2016 Nov 2;5:e18496. doi: 10.7554/eLife.18496 (PMC5092053; doi:10.7554/eLife.18496)
Supplement: Figure 2—source data 1. — DOI: http://dx.doi.org/10.7554/eLife.18496.011 [file elife-18496-fig2-data1.xlsx]

## Sheet: Fig 2
Fig. 2D		IL-6 ELISA PAM3CSK4 time course, PPP1R11 OE				Fig. 2E		CXCL1 ELISA PAM3CSK4 time course, PPP1R11 OE				Fig. 2F		IL-6 ELISA PAM3CSK4 time course, PPP1R11 KD				Fig. 2G		CXCL1 ELISA PAM3CSK4 time course, PPP1R11 KD
Condition	Time (hour)	Replicate	IL-6 Signal (pg/mL)	Mean		Condition	Time (hour)	Replicate	CXCL1 Signal (pg/mL)	Mean		Condition	Time (hour)	Replicate	IL-6 Signal (pg/mL)	Mean		Condition	Time (hour)	Replicate	IL-6 Signal (pg/mL)	Mean
EMPTY	0	1	3.619	3.909		EMPTY	0	1	-2.09	-0.864		Control siRNA	0	1	5.305	4.606		Control siRNA	0	1	-1.184	-5.24
		2	3.087					2	-2.09					2	5.305					2	-4.083
		3	5.021					3	1.588					3	3.715					3	-6.111
	1	1	3.552	2.234			1	1	-3.111	-0.863				4	4.097					4	-9.584
		2	2.755					2	-2.703				1	1	4.16	3.747			1	1	-9.005	-7.413
		3	0.394					3	3.224					2	3.779					2	-6.98
	2	1	4.486	3.997			2	1	89.595	85.31				3	3.461					3	-3.793
		2	3.885					2	93.834					4	3.588					4	-9.873
		3	3.619					3	72.502				2	1	9.124	7.437			2	1	56.251	38.498
	4	1	18.749	16.647			4	1	403.119	393.676				2	5.369					2	21.241
		2	13.954					2	350.903					3	7.405					3	40.016
		3	17.238					3	427.007					4	7.851					4	36.486
	6	1	26.067	27.803			6	1	722.115	670.241			4	1	13.011	11.736			4	1	196.864	202.215
		2	27.246					2	638.439					2	10.525					2	180.392
		3	30.096					3	650.169					3	12.756					3	223.181
	8	1	40.523	32.086			8	1	954.186	796.167				4	10.653					4	208.424
		2	20.193					2	723.537				6	1	17.923	17.062			6	1	421.488	441.002
		3	35.542					3	710.778					2	18.754					2	411.63
PPP1R11	0	1	3.685	4.32233		PPP1R11	0	1	2.61	1.52				3	15.371					3	521.295
		2	6.497					2	1.997					4	16.2					4	409.596
		3	2.785					3	-0.048				8	1	30.076	29.088			8	1	589.795	704.777
	1	1	1.501	3.931			1	1	-0.865	-0.32				2	37.646					2	695.861
		2	4.735					2	-1.069					3	21.82					3	847.933
		3	5.557					3	0.974					4	26.81					4	685.517
	2	1	3.885	4.933			2	1	34.724	53.195		PPP1R11 siRNA1	0	1	4.924	5.226		PPP1R11 siRNA1	0	1	-9.295	-9.439
		2	5.825					2	59.707					2	5.242					2	-10.162
		3	5.088					3	65.153					3	5.178					3	-8.137
	4	1	8.519	9.34967			4	1	222.763	202.399				4	5.56					4	-10.162
		2	12.999					2	285.129				1	1	5.687	5.846			1	1	16.567	-2.178
		3	6.531					3	99.305					2	7.596					2	-7.559
	6	1	16.005	16.124			6	1	336.981	362.915				3	5.623					3	-9.295
		2	19.367					2	354.456					4	4.478					4	-8.427
		3	12.999					3	397.309				2	1	7.66	8.631			2	1	123.98	90.61
	8	1	19.918	18.361			8	1	521.5	483.55				2	7.214					2	43.255
		2	19.23					2	501.087					3	10.716					3	130.055
		3	15.936					3	428.064					4	8.933					4	65.147
TRIM52	0	1	2.084	2.17933		TRIM52	0	1	-4.947	-1.61			4	1	14.605	18.0097			4	1	488.491	369.877
		2	3.802					2	4.862					2	11.927					2	265.72
		3	0.652					3	-4.744					3	20.734					3	415.025
	1	1	7.113	2.75033			1	1	-2.295	2.137				4	18.69					4	310.273
		2	0.744					2	0.974				6	1	26.81	30.053			6	1	997.76	781.102
		3	0.394					3	7.73					2	20.862					2	669.524
	2	1	9.534	5.917			2	1	36.797	55.699				3	41.63					3	731.096
		2	4.997					2	42.609					4	30.909					4	726.027
		3	3.22					3	87.69				8	1	48.066	54.315			8	1	1245.24	1157.33
	4	1	23.09	21.677			4	1	313.349	376.247				2	36.94					2	1156.92
		2	26.483					2	325.953					3	73.22					3	1206.02
		3	15.457					3	489.441					4	59.035					4	1021.13
	6	1	21.296	26.421			6	1	640.348	622.669		PPP1R11 siRNA2	0	1	6.896	8.297		PPP1R11 siRNA2	0	1	-11.03	-8.209
		2	29.47					2	568.715					2	7.023					2	-5.821
		3	28.496					3	658.945					3	8.806					3	-10.162
	8	1	28.427	37.314			8	1	582.146	726.295				4	10.462					4	-5.821
		2	39.118					2	697.545				1	1	6.514	7.151			1	1	-7.559	-3.86
		3	44.397					3	899.194					2	6.069					2	6.368
														3	7.15					3	-6.98
														4	8.869					4	-7.269
													2	1	14.286	15.626			2	1	478.006	273.123
														2	13.585					2	74.071
														3	15.243					3	194.059
														4	19.392					4	346.354
													4	1	23.355	22.445			4	1	588.343	539.957
														2	20.478					2	345.694
														3	19.456					3	476.263
														4	26.49					4	749.526
													6	1	31.23	38.533			6	1	1350.82	1058.31
														2	37.196					2	697.398
														3	44.525					3	1110.16
														4	41.18					4	1074.86
													8	1	59.811	63.095			8	1	1266.53	1264.27
														2	66.023					2	967.63
														3	65.181					3	1561.62
														4	61.363					4	1261.31
