# Supplementary material for: RING finger E3 ligase PPP1R11 regulates TLR2 signaling and innate immunity
Source: eLife. 2016 Nov 2;5:e18496. doi: 10.7554/eLife.18496 (PMC5092053; doi:10.7554/eLife.18496)
Supplement: Figure 3—source data 1. — DOI: http://dx.doi.org/10.7554/eLife.18496.017 [file elife-18496-fig3-data1.xlsx]

## Sheet: Fig 3
Fig. 3	PPP1R11 Gene Transfer OE + SA
	A) IL-1b ELISA				B) IL-6 ELISA				C) TNFa ELISA				D) BAL [Protein]
	Condition	Replicate	IL-1 (ng/mL)		Condition	Replicate	IL-6 (ng/mL)		Condition	Replicate	TNFa (ng/mL)		Condition	Replicate	[Protein] (mg/mL)
	Empty	1	53.586		Empty	1	347.427		Empty	1	644.757		Empty	1	3.534
		2	44.671			2	423.107			2	4104.61			2	4.594
		3	176.264			3	724.396			3	1587.91			3	4.532
		4	50.8			4	435.958			4	687.693			4	3.137
		5	447.842			5	1274.14			5	610.811			5	5.595
		6	348.921			6	1451.2			6	1603.43			6	3.137
		7	144.663			7	998.555			7	2038.01			7	2.96
		8	241.573			8	868.615			8	1732.57			8	3.492
	PPP1R11 OE	1	0		PPP1R11 OE	1	183.218		PPP1R11 OE	1	604.215		PPP1R11 OE	1	1.215
		2	1.361			2	211.776			2	409.624			2	1.565
		3	104.635			3	761.521			3	279.32			3	2.797
		4	50.8			4	615.875			4	199.12			4	1.919
		5	55.814			5	471.656			5	547.634			5	2.196
		6	14.97			6	655.856			6	658.797			6	2.897
		7	66.713			7	296.023			7	806.32			7	1.205
						8	634.437			8	306.96			8	2.14
	E) BAL Cell Count				F) Bacteria - Lung				G) Bacteria - BAL				H) Bacteria - Blood
	Condition	Replicate	BAL Cell Count (105/mL)		Condition	Replicate	CFU		Condition	Replicate	CFU		Condition	Replicate	CFU
	Empty	1	12.1		Empty	1	4000		Empty	1	2720		Empty	1	600
		2	16.9			2	6000			2	2400			2	900
		3	9.87			3	3000			3	3600			3	60
		4	8.9			4	2000			4	2000			4	240
		5	5.77			5	6000			5	4000			5	860
		6	3.93			6	3600			6	3200			6	600
		7	14			7	1200			7	1800			7	40
		8	12.1			8	3200			8	3200			8	60
	PPP1R11 OE	1	5.7		PPP1R11 OE	1	6000		PPP1R11 OE	1	8000		PPP1R11 OE	1	600
		2	4.87			2	8000			2	5000			2	400
		3	3.23			3	40000			3	36000			3	5000
		4	3.03			4	40000			4	20000			4	8000
		5	5.77			5	30000			5	24000			5	3600
		6	6.37			6	30000			6	40000			6	1800
		7	6.8			7	10000			7	8000			7	1500
		8	4.13			8	60000			8	32000			8	2600
	I) Bacteria - Liver				J) Bacteria - Spleen				K) Bacteria - Kidney
	Condition	Replicate	CFU		Condition	Replicate	CFU		Condition	Replicate	CFU
	Empty	1	180		Empty	1	120		Empty	1	0
		2	2400			2	0			2	0
		3	160			3	40			3	60
		4	600			4	160			4	0
		5	1320			5	440			5	0
		6	800			6	400			6	40
		7	360			7	0			7	40
		8	1240			8	300			8	0
	PPP1R11 OE	1	1400		PPP1R11 OE	1	40		PPP1R11 OE	1	40
		2	840			2	60			2	40
		3	1240			3	200			3	100
		4	6400			4	500			4	120
		5	8000			5	700			5	900
		6	1760			6	360			6	120
		7	1120			7	640			7	0
		8	640			8	80			8	1200
