# Supplementary material for: RING finger E3 ligase PPP1R11 regulates TLR2 signaling and innate immunity
Source: eLife. 2016 Nov 2;5:e18496. doi: 10.7554/eLife.18496 (PMC5092053; doi:10.7554/eLife.18496)
Supplement: Figure 4—source data 1. — DOI: http://dx.doi.org/10.7554/eLife.18496.019 [file elife-18496-fig4-data1.xlsx]

## Sheet: Fig 4
Fig. 4	PPP1R11 KD + SA
	A) IL-1b ELISA				B) IL-6 ELISA				C) TNFa ELISA
	Condition	Replicate	IL-1 (ng/mL)		Condition	Replicate	IL-6 (ng/mL)		Condition	Replicate	TNFa (ng/mL)
	Con shRNA	1	8.427		Con shRNA	1	113.227		Con shRNA	1	17.552
		2	12.005			2	57.011			2	51.307
		3	12.277			3	15.331			3	61.311
		4	15.338			4	57.208			4	70.141
		5	14.902			5	74.709			5	80.629
		6	10.845			6	34.155			6	74.463
		7	16.467			7	57.898			7	78.318
		8	12.597			8	73.105			8	60.689
	PPP shRNA	1	24.427		PPP shRNA	1	145.97		PPP shRNA	1	115.606
		2	40.158			2	165.729			2	114.981
		3	66.841			3	226.079			3	129.743
		4	88.345			4	162.442			4	205.42
		5	61.398			5	144.183			5	299.293
		6	42.372			6	157.995			6	162.554
		7	65.26			7	308.778			7	227.365
		8	50.607			8	140.927			8	225.927
	D) BAL [Protein]				E) BAL Cell Count				F) Bacteria - BAL
	Condition	Replicate	[Protein] (mg/mL)		Condition	Replicate	BAL Cell Count (105/mL)		Condition	Replicate	CFU
	Con shRNA	1	0.81		Con shRNA	1	4.3		Con sh	1	1100
		2	0.71			2	3.035			2	200
		3	0.4675			3	2.16			3	800
		4	0.695			4	2.715			4	240
		5	0.5375			5	1.735			5	1200
		6	0.4625			6	1.835			6	940
		7	0.6475			7	2.85			7	560
		8	0.705			8	2.08			8	1000
	PPP shRNA	1	1.4325		PPP shRNA	1	12.75		PPP sRNA	1	240
		2	1.4775			2	11.2			2	80
		3	1.8025			3	9			3	80
		4	1.6375			4	4.63			4	400
		5	1.405			5	6.2			5	60
		6	2.28			6	3.15			6	0
		7	2.1525			7	1.255			7	20
		8	1.4175			8	15.25			8	160
	G) Bacteria - Lung				H) Bacteria - Blood				I) Bacteria - Liver
	Condition	Replicate	CFU		Condition	Replicate	CFU		Condition	Replicate	CFU
	Con sh	1	600		Con shRNA	1	40		Con shRNA	1	40
		2	540			2	240			2	60
		3	80			3	520			3	2000
		4	400			4	240			4	1200
		5	1800			5	60			5	20
		6	4000			6	320			6	160
		7	3600			7	160			7	640
		8	3200			8	100			8	0
	PPP sh	1	360		PPP shRNA	1	0		PPP shRNA	1	0
		2	20			2	40			2	80
		3	0			3	0			3	40
		4	20			4	20			4	200
		5	20			5	40			5	0
		6	0			6	0			6	0
		7	0			7	140			7	0
		8	0			8	0			8	160
